# Supplementary material for: Thrombi With a Higher Erythrocyte Composition Are More Fragile in Acute Stroke
Source: PubMed Central journal article supplement — J Stroke. 2024 Sep 4;26(3):454–7. doi: 10.5853/jos.2024.00787 (PMC11471361; doi:10.5853/jos.2024.00787), 2024-09-04
Supplement: jos-2024-00787-Supplementary-Table-1.pdf [file jos-2024-00787-Supplementary-Table-1.pdf]

**Supplementary Table 1.** Primary antibodies for histological components of thrombus

| Target                        | Immunogen           | Clonality         | Dilution | Catalog number | Supplier*         |
|-------------------------------|---------------------|-------------------|----------|----------------|-------------------|
| Erythrocyte                   | Glycophorin A       | Rabbit monoclonal | 1:400    | ab129024       | Abcam             |
| Platelet                      | CD42b               | Rabbit monoclonal | 1:100    | ab134087       | Abcam             |
| Fibrin                        | Fibrinogen          | Rabbit polyclonal | 1:200    | ab34269        | Abcam             |
| Lymphocyte                    | CD3                 | Rabbit monoclonal | 1:200    | ab16669        | Abcam             |
| Neutrophil                    | Neutrophil elastase | Rabbit polyclonal | 1:200    | ab68672        | Abcam             |
| Monocyte                      | CD68                | Mouse monoclonal  | 1:200    | MA5-13324      | Fisher Scientific |
| Tissue factor                 | CD142               | Rabbit polyclonal | 1:100    | PA5-27278      | Fisher Scientific |
| Neutrophil extracellular trap | Histone H3          | Rabbit polyclonal | 1:100    | ab5103         | Abcam             |

\*Abcam, Cambridge, UK; Fisher Scientific, Waltham, MA, USA.

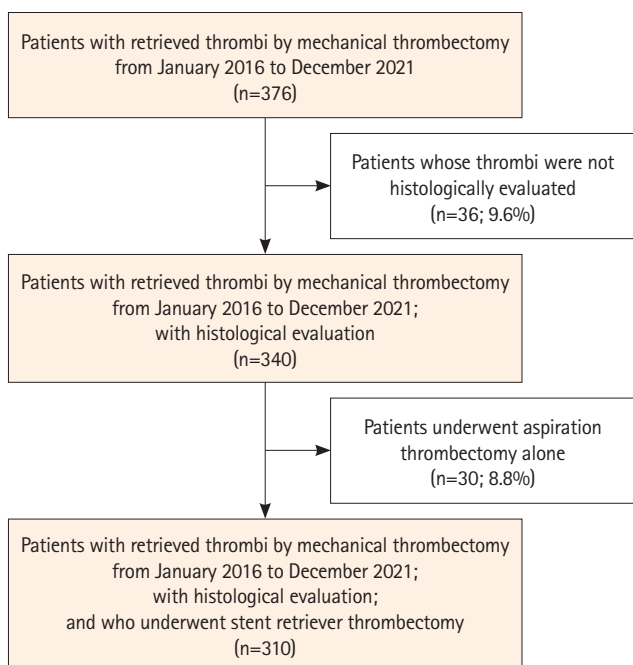

**Supplementary Figure 1.** Patient selection flowchart.

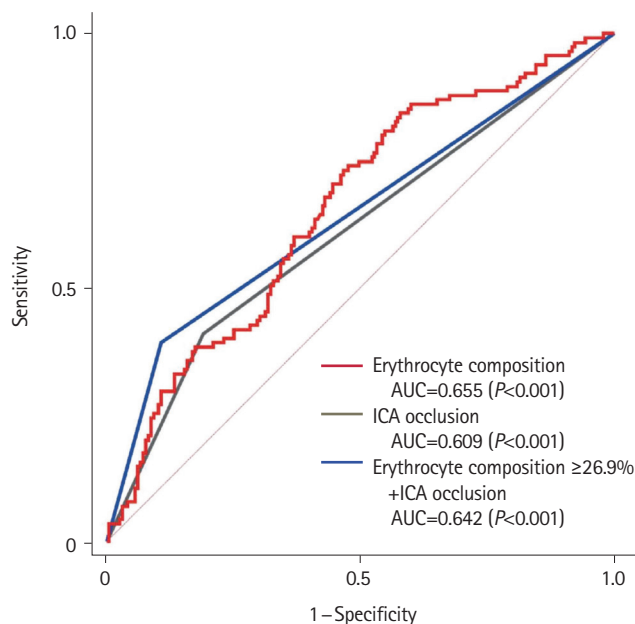

**Supplementary Figure 2.** Receiver operating characteristic curves of erythrocyte composition in the thrombus and internal carotid artery (ICA) occlusion to predict a fragile thrombus. The erythrocyte composition in the thrombus could predict a fragile thrombus (area under the receiver operating characteristic curve [AUC], 0.655; cutoff, 26.9%; sensitivity, 84.4%; specificity, 42.1%;  $P<0.001$ ). ICA occlusion could also predict fragile thrombi (AUC, 0.609; sensitivity, 40.9%; specificity, 81.0%;  $P<0.001$ ). Considering both erythrocyte composition and ICA occlusion, it could predict fragile thrombi (AUC, 0.642; sensitivity, 39.1%; specificity, 89.2%;  $P<0.001$ ).
